# Supplementary material for: The Effect of Palm Oil-Fried Street Kokor on Liver and Kidney Biomarkers of Swiss Albino Mice
Source: Hindawi journal article supplement (doi:10.1155/2020/8819749), 2020-12-04
Supplement: f1 [file 8819749.f1.zip]

| File I                                             |       |     |           |           |              |                    |
|----------------------------------------------------|-------|-----|-----------|-----------|--------------|--------------------|
|                                                    |       |     |           |           |              |                    |
| <u>Laboratory results of the serum of the mice</u> |       |     |           |           |              |                    |
| Ser No.                                            | Group | Sex | ALT (U/L) | AST (U/L) | Urea (mg/dl) | Creatinine (mg/dl) |
| 1                                                  | 1     | 1   | 27.12     | 80.61     | 39.24        | 0.59               |
| 2                                                  | 1     | 1   | 21.61     | 79.21     | 40.02        | 0.61               |
| 3                                                  | 1     | 1   | 22.22     | 76.40     | 39.54        | 0.59               |
| 4                                                  | 1     | 1   | 23.45     | 77.92     | 39.72        | 0.56               |
| 9                                                  | 2     | 1   | 31.60     | 93.47     | 39.78        | 0.73               |
| 10                                                 | 2     | 1   | 34.52     | 102.29    | 40.02        | 0.74               |
| 11                                                 | 2     | 1   | 37.91     | 107.39    | 40.38        | 0.76               |
| 12                                                 | 2     | 1   | 36.29     | 94.62     | 40.80        | 0.77               |
| 17                                                 | 3     | 1   | 38.41     | 115.37    | 40.44        | 0.81               |
| 18                                                 | 3     | 1   | 42.26     | 128.46    | 40.08        | 0.79               |
| 19                                                 | 3     | 1   | 43.53     | 119.91    | 40.68        | 0.80               |
| 20                                                 | 3     | 1   | 39.47     | 122.18    | 40.88        | 0.78               |
| 25                                                 | 4     | 1   | 49.84     | 142.11    | 40.74        | 0.83               |
| 26                                                 | 4     | 1   | 47.90     | 138.42    | 40.62        | 0.83               |
| 27                                                 | 4     | 1   | 53.76     | 151.23    | 41.04        | 0.85               |
| 28                                                 | 4     | 1   | 52.76     | 151.23    | 41.04        | 0.85               |
| 5                                                  | 1     | 2   | 21.70     | 83.68     | 39.30        | 0.58               |
| 6                                                  | 1     | 2   | 23.85     | 82.82     | 39.54        | 0.59               |
| 7                                                  | 1     | 2   | 26.71     | 76.97     | 39.78        | 0.58               |
| 8                                                  | 1     | 2   | 26.61     | 82.89     | 39.72        | 0.57               |
| 13                                                 | 2     | 2   | 39.91     | 99.57     | 39.60        | 0.72               |
| 14                                                 | 2     | 2   | 31.27     | 105.56    | 40.32        | 0.74               |
| 15                                                 | 2     | 2   | 32.61     | 102.86    | 40.14        | 0.73               |
| 16                                                 | 2     | 2   | 38.74     | 107.58    | 40.70        | 0.78               |
| 21                                                 | 3     | 2   | 38.39     | 126.17    | 40.36        | 0.79               |
| 22                                                 | 3     | 2   | 41.90     | 111.96    | 40.44        | 0.80               |
| 23                                                 | 3     | 2   | 42.57     | 129.31    | 40.65        | 0.80               |
| 24                                                 | 3     | 2   | 48.39     | 123.45    | 40.38        | 0.77               |
| 29                                                 | 4     | 2   | 50.60     | 148.29    | 40.58        | 0.81               |
| 30                                                 | 4     | 2   | 53.74     | 153.69    | 40.72        | 0.84               |
| 31                                                 | 4     | 2   | 51.70     | 149.31    | 40.68        | 0.85               |
| 32                                                 | 4     | 2   | 52.96     | 147.56    | 40.80        | 0.85               |

**Key for sex**  
1 = Male  
2 = Female
